# Supplementary material for: Homoconjugation in triptycenes: an inquiry through photochromism
Source: Royal Society of Chemistry journal article supplement (doi:10.1039/d1nj04634a), 2021-12-14
Supplement: d1nj04634a1.pdf [file d1nj04634a1.pdf]

## SUPPORTING INFORMATION

### Homoconjugation in Triptycenes: An Inquiry Through Photochromism

Kanyashree Jana and Jarugu Narasimha Moorthy<sup>a,b,\*</sup>

<sup>a</sup>*Department of Chemistry, Indian Institute of Technology, Kanpur 208016, INDIA*

<sup>b</sup>*School of Chemistry, Indian Institute of Science Education and Research Thiruvananthapuram,*

*Trivandrum 695551, INDIA*

\*Corresponding Author; E-mail: [moorthy@iitk.ac.in](mailto:moorthy@iitk.ac.in)

---

#### TABLE OF CONTENTS

---

|                                                                                                              |         |
|--------------------------------------------------------------------------------------------------------------|---------|
| 1. Table of X-Ray crystallographic data of <b>Trip-chrom</b>                                                 | S2      |
| 2. Thermal ellipsoid plot for <b>Trip-chrom</b>                                                              | S3      |
| 3. <sup>1</sup> H NMR spectrum of <b>4</b> in CDCl <sub>3</sub>                                              | S4      |
| 4. <sup>13</sup> C NMR spectrum of <b>4</b> in CDCl <sub>3</sub>                                             | S5      |
| 5. <sup>1</sup> H NMR spectrum of <b>2</b> in CDCl <sub>3</sub>                                              | S6      |
| 6. <sup>1</sup> H NMR spectrum of <b>3</b> in CDCl <sub>3</sub>                                              | S7      |
| 7. <sup>13</sup> C NMR spectrum of <b>3</b> in CDCl <sub>3</sub>                                             | S8      |
| 8. Bond length comparison data                                                                               | S9      |
| 9. Details of theoretical calculations and tables of cartesian coordinates of different structures optimized | S10-S25 |
| 10. Frontier orbital plots                                                                                   | S26     |
| 11. References                                                                                               | S26     |

---

**Single Crystal X-ray Structure Determinations.** The single crystals of **Trip-chrom** were obtained by slow evaporation of chloroform/hexane mixture (9:1, v/v) at ambient temperature. Thus grown single crystals were subjected to intensity data collection in a CCD detector system equipped with Mo-sealed Siemens ceramic diffraction tube ( $\lambda = 0.7107 \text{ \AA}$ ) and a highly oriented graphite monochromator operating at 50 kV and 30 mA. The structure was solved by direct methods using the SHELXL package and refined by the full matrix least-squares method based on  $F^2$ .

**Table S1** X-Ray Crystallographic Data of **Trip-chrom**

| Compound                                   | <b>Trip-chrom</b>                  |
|--------------------------------------------|------------------------------------|
| molecular formula                          | $C_{35}H_{24}O$                    |
| formula weight                             | 460.54                             |
| solvent for crystallization                | Chloroform                         |
| crystal system                             | Monoclinic                         |
| space group                                | $P 2_1/c$                          |
| $a$ (Å)                                    | 8.858(1)                           |
| $b$ (Å)                                    | 14.662 (2)                         |
| $c$ (Å)                                    | 18.902 (2)                         |
| $\alpha$ (deg)                             | 90                                 |
| $\beta$ (deg)                              | 102.09 (13)                        |
| $\gamma$ (deg)                             | 90                                 |
| volume (Å <sup>3</sup> )                   | 2400.6 (17)                        |
| $Z$                                        | 4                                  |
| calculated density (g/cm <sup>3</sup> )    | 1.274                              |
| absorption coefficient (mm <sup>-1</sup> ) | 0.075                              |
| $F(000)$                                   | 968                                |
| goodness-of-fit on $F^2$                   | 0.960                              |
| final $R$ indices [ $I > 2\sigma(I)$ ]     | $R_1 = 0.0730,$<br>$wR_2 = 0.1756$ |
| $R$ indices (all data)                     | $R_1 = 0.1746,$<br>$wR_2 = 0.2308$ |
| CCDC deposition number                     | 1979544                            |

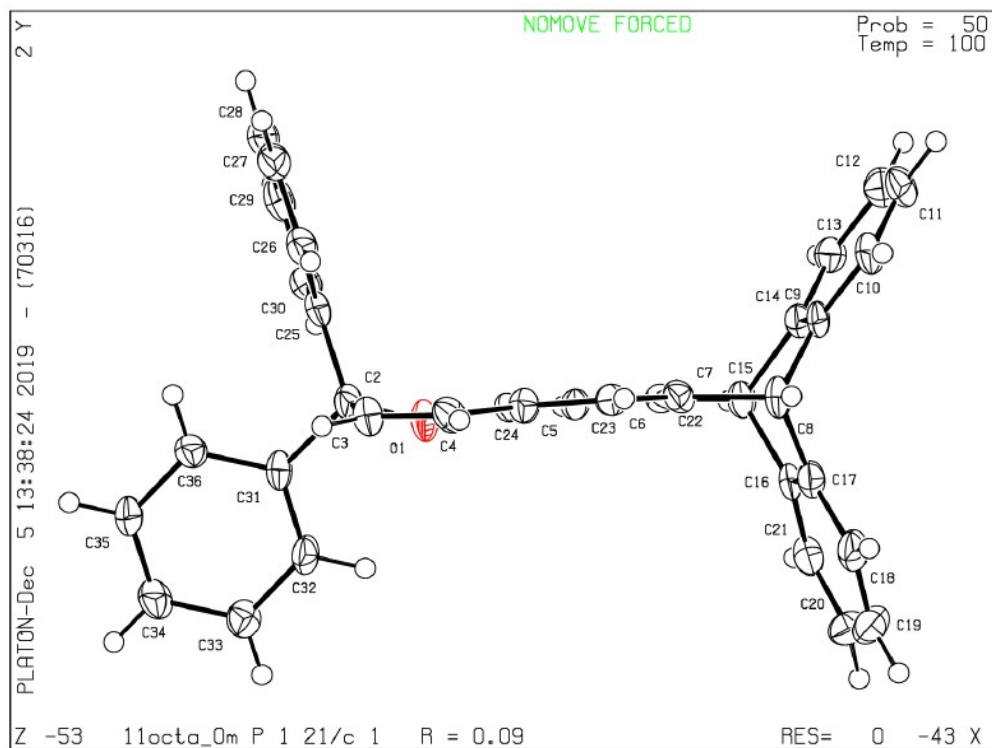

**Fig. S1** Thermal ellipsoid plot for **Trip-chrom** drawn at the contour probability of 50%.

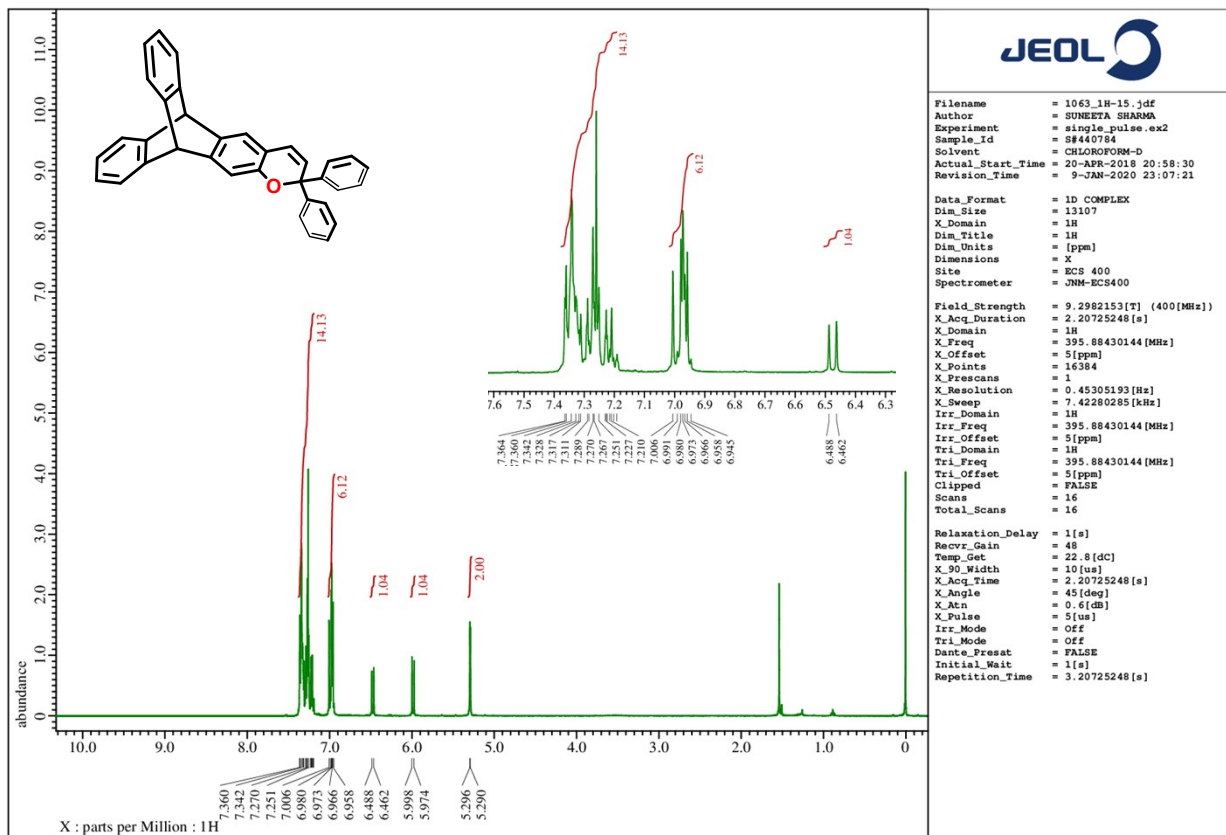

Fig. S2  $^1\text{H}$  NMR (400 MHz) spectrum of 4 in  $\text{CDCl}_3$ .

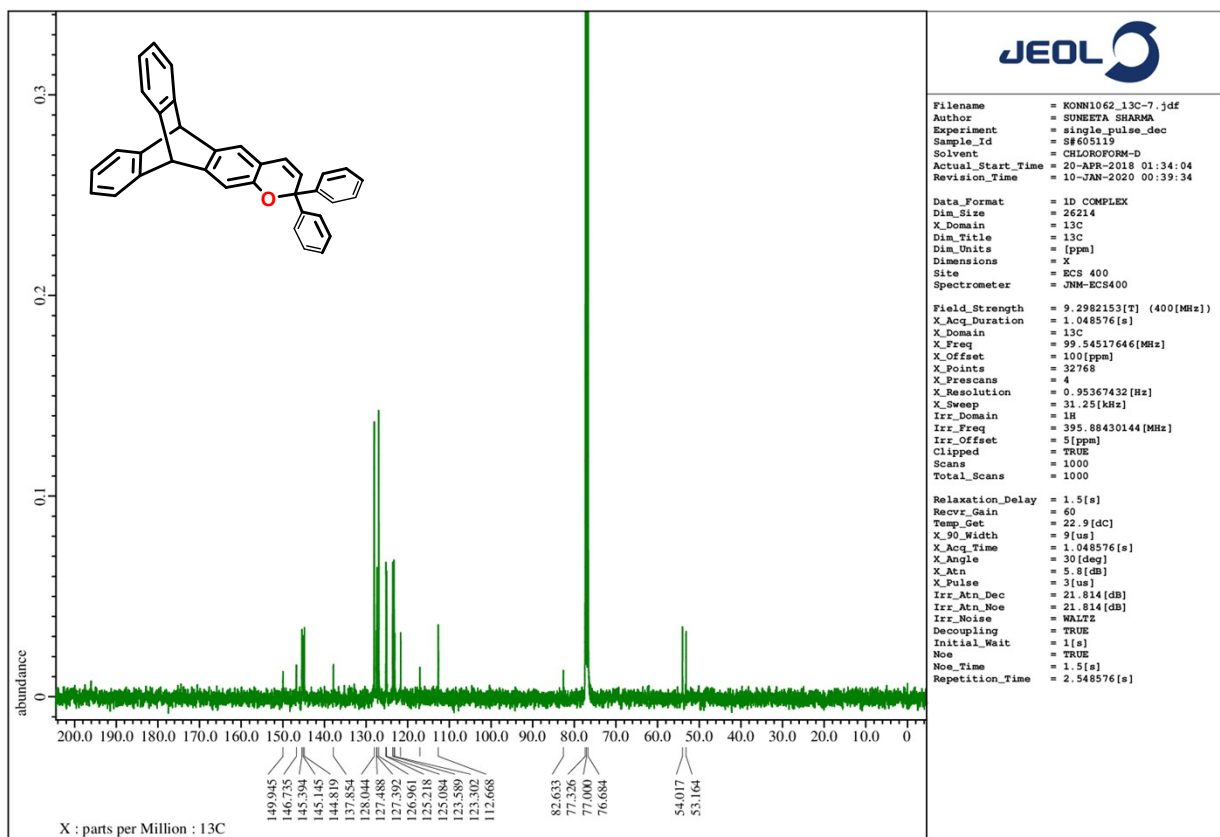

**Fig. S3**  $^{13}\text{C}$  NMR (100 MHz) spectrum of **4** in  $\text{CDCl}_3$ .

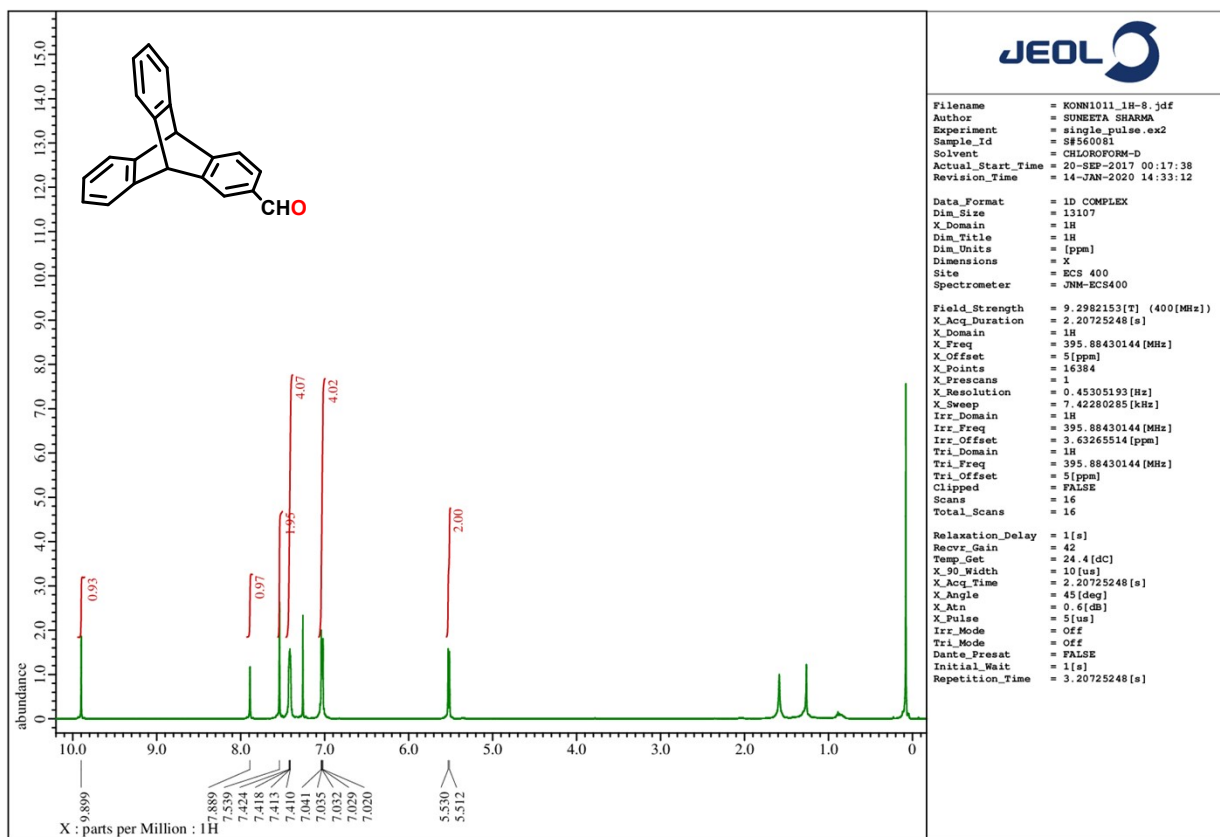

Fig. S4  $^1\text{H}$  NMR (400 MHz) spectrum of **2** in  $\text{CDCl}_3$ .

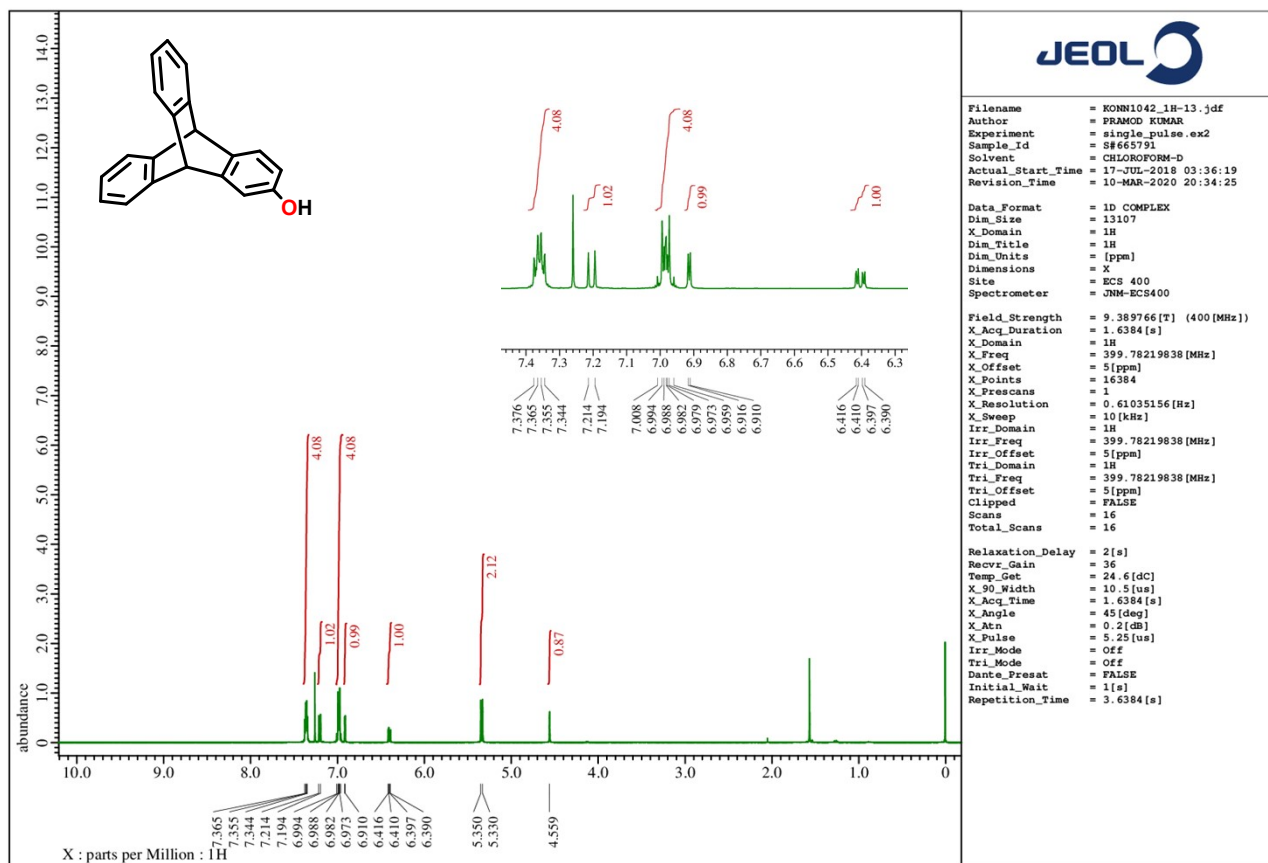

Fig. S5 <sup>1</sup>H NMR (400 MHz) spectrum of **3** in CDCl<sub>3</sub>.

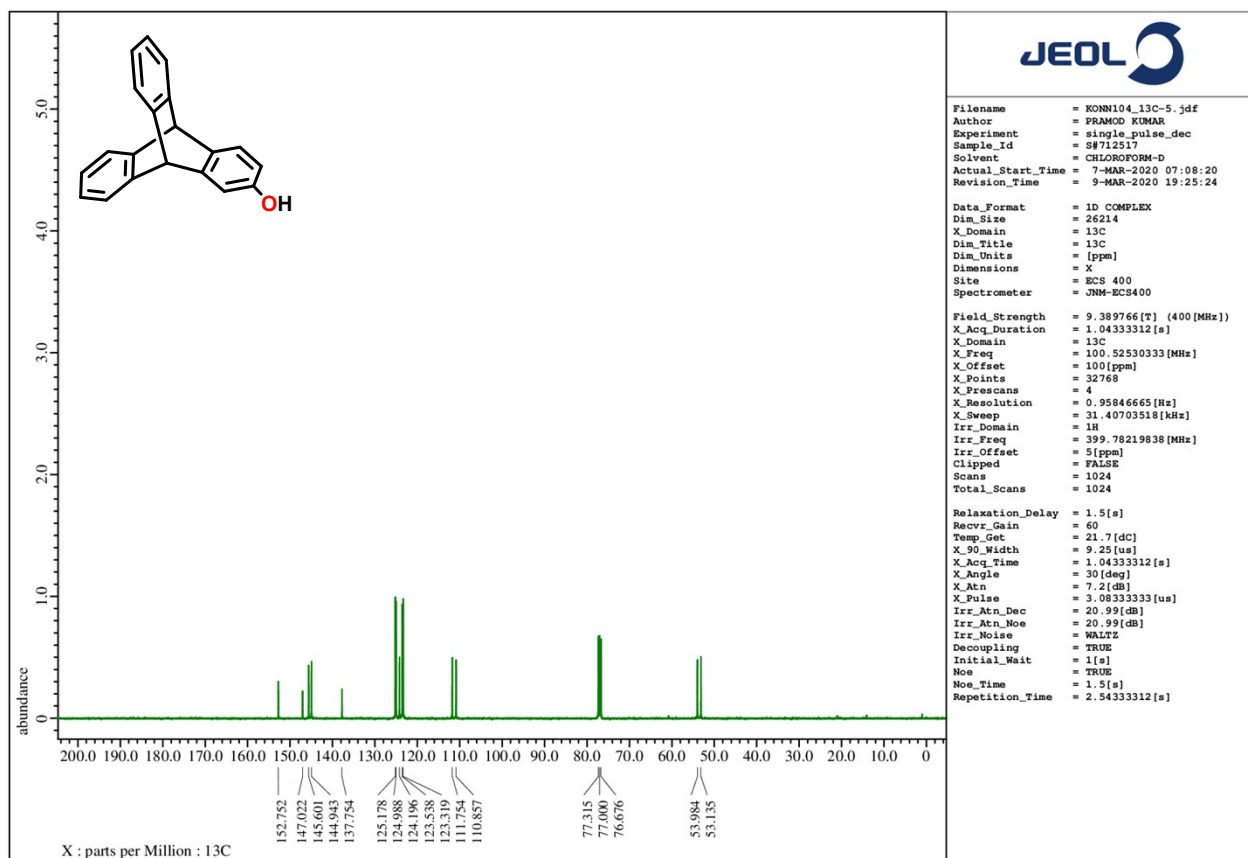

Fig. S6 <sup>13</sup>C NMR (100 MHz) spectrum of 3 in CDCl<sub>3</sub>.



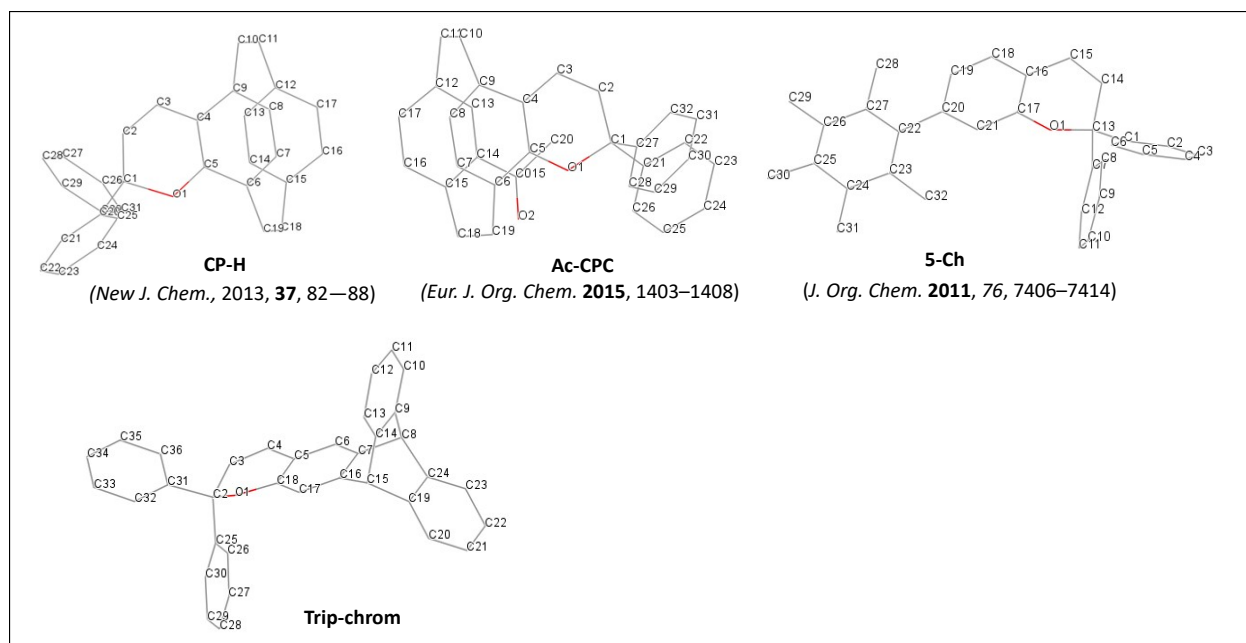

**Fig. S7** Bond length comparison of **Trip-chrom** with other reported chromenes.

**Table S2** Bond length comparison data

| Compound          | Bond    | Bond length (Å) |
|-------------------|---------|-----------------|
| <b>CP-H</b>       | C9-C4   | 1.417           |
| <b>Ac-CPC</b>     | C9-C4   | 1.411           |
|                   | C14-C15 | 1.420           |
| <b>5-Ch</b>       | C22-C23 | 1.409           |
|                   | C22-C27 | 1.410           |
| <b>Trip-chrom</b> | C7-C16  | 1.415           |

## Theoretical Calculations

All the density functional theory calculations were performed using the Gaussian 09<sup>1</sup> program package. The geometry optimizations of all the molecules and their respective photogenerated intermediates namely, **Trip-chrom**, **Trip-chrom(TC)**, **Trip-chrom (TT)**, **BP**, **BP\_TC**, **BP\_TT**, **5-6Nap**, **5-6\_TC**, **5-6\_TT**, **7-8Nap**, **7-8\_TC** and **7-8\_TT**, were carried out using CAMB3LYP functional and 6-311G(d,p) basis set taking toluene as the solvent. Vibrational calculations of the optimized structures at the same level of theory were carried out to find their relative thermodynamic stabilities.

**Table S3** Cartesian coordinates (in Angstroms) for the optimized structure of **Trip-chrom**

| Atom type | X           | Y           | Z           |
|-----------|-------------|-------------|-------------|
| O         | -1.93446900 | -0.71625700 | -0.39600900 |
| C         | 0.36122000  | -0.44063600 | -0.86084200 |
| H         | 0.12501000  | -0.48828700 | -1.91676200 |
| C         | 0.90950200  | -0.33409300 | 1.87806000  |
| H         | 1.11408900  | -0.30277100 | 2.94326300  |
| C         | 3.82805900  | -1.31669000 | -0.80449100 |
| C         | -0.66938900 | -0.51531200 | 0.07087100  |
| C         | -3.22574500 | 1.24947700  | 0.10166900  |
| C         | -0.41198500 | -0.47003100 | 1.44041300  |
| C         | 1.65699000  | -0.30477000 | -0.40712900 |
| C         | 3.58607100  | 1.10171600  | -0.85471100 |
| C         | -5.54298300 | -0.59127700 | 0.23231400  |
| H         | -5.67512200 | 0.36358800  | 0.72736500  |
| C         | 3.86634900  | 1.15713100  | 0.51326100  |
| C         | 3.92222300  | 2.15670900  | -1.67975700 |
| H         | 3.70341300  | 2.11417200  | -2.74090300 |
| C         | 2.90654100  | -0.19663800 | -1.27005900 |
| H         | 2.69069800  | -0.24049700 | -2.33658900 |
| C         | 4.37011700  | -2.31696500 | -1.58702000 |
| H         | 4.15283300  | -2.36139900 | -2.64842800 |
| C         | -2.79011600 | -0.52948800 | 1.86463600  |
| H         | -3.65546100 | -0.65012600 | 2.50372300  |
| C         | -1.55056800 | -0.61821800 | 2.33589800  |
| H         | -1.36541800 | -0.81534000 | 3.38606100  |
| C         | -4.26034600 | -1.04906500 | -0.05908800 |
| C         | 3.42068000  | -0.09294900 | 1.26053900  |
| H         | 3.63782600  | -0.04914100 | 2.32699700  |
| C         | 4.82464600  | 3.33311500  | 0.22166200  |

|   |             |             |             |
|---|-------------|-------------|-------------|
| H | 5.30928600  | 4.20770600  | 0.63898700  |
| C | 4.10777500  | -1.25960200 | 0.56356900  |
| C | 1.93508300  | -0.24721600 | 0.96284300  |
| C | -4.11067800 | -2.26874000 | -0.70845700 |
| H | -3.11700600 | -2.62869800 | -0.93480600 |
| C | -5.22628900 | -3.01417200 | -1.06752300 |
| H | -5.09453100 | -3.96034700 | -1.57913900 |
| C | 4.48417400  | 2.26744700  | 1.05388800  |
| H | 4.70218500  | 2.31106500  | 2.11518700  |
| C | -3.35555500 | 1.64711900  | -1.22908500 |
| H | -3.32722900 | 0.89775300  | -2.01074800 |
| C | -6.50126500 | -2.55529700 | -0.77276200 |
| H | -7.37036300 | -3.13862300 | -1.05250300 |
| C | -3.04341600 | -0.24411300 | 0.39909400  |
| C | -3.42454700 | 3.55878800  | 0.77284900  |
| H | -3.44705900 | 4.30173200  | 1.56127500  |
| C | -6.65581700 | -1.34046400 | -0.11842200 |
| H | -7.64713300 | -0.96954300 | 0.11354300  |
| C | -3.51398600 | 2.98270500  | -1.55395000 |
| H | -3.60996700 | 3.27698700  | -2.59239900 |
| C | 4.93043200  | -2.20296500 | 1.14691300  |
| H | 5.14817800  | -2.15903600 | 2.20829500  |
| C | -3.25702200 | 2.21592300  | 1.09699300  |
| H | -3.14114300 | 1.92662600  | 2.13356700  |
| C | -3.55224800 | 3.94532600  | -0.55044200 |
| H | -3.67822300 | 4.99121500  | -0.80375300 |
| C | 4.54576300  | 3.27829100  | -1.13450900 |
| H | 4.81245400  | 4.11003100  | -1.77558600 |
| C | 5.47836100  | -3.21349500 | 0.35775200  |
| H | 6.12433000  | -3.95731200 | 0.80876800  |
| C | 5.20040900  | -3.27016100 | -0.99853900 |
| H | 5.62948000  | -4.05805600 | -1.60599500 |

**Table S4** Cartesian coordinates (in Angstroms) for the optimized structure of **Trip-chrom (TC)**

| Atom type | X          | Y           | Z           |
|-----------|------------|-------------|-------------|
| C         | 0.89294500 | 0.55312800  | 0.30005100  |
| H         | 0.62504200 | 1.49486700  | 0.76843700  |
| C         | 1.58783600 | -1.91066300 | -0.91990400 |

|   |             |             |             |
|---|-------------|-------------|-------------|
| H | 1.83514700  | -2.85568400 | -1.38849200 |
| C | 4.22298000  | 1.17717500  | -0.73102200 |
| C | 2.17830400  | 0.21236300  | 0.13672400  |
| C | 4.20637700  | 0.09253200  | 1.45415800  |
| C | 4.53806100  | -1.12498000 | 0.85374500  |
| C | 4.58852400  | 0.35434200  | 2.75655500  |
| H | 4.32874600  | 1.29749300  | 3.22408700  |
| C | 3.40797000  | 1.00995200  | 0.54160600  |
| H | 3.15392900  | 1.95938200  | 1.01081000  |
| C | 4.62004400  | 2.37045400  | -1.30474100 |
| H | 4.36095400  | 3.31456300  | -0.83867900 |
| C | 4.03150900  | -1.24875200 | -0.57484600 |
| H | 4.30230100  | -2.19424800 | -1.04156600 |
| C | 5.63869500  | -1.81354800 | 2.86620900  |
| H | 6.20014700  | -2.55511800 | 3.42168100  |
| C | 4.55411700  | -0.03907800 | -1.33420300 |
| C | 2.52631600  | -1.05374600 | -0.48866900 |
| C | 5.24883700  | -2.08006200 | 1.55602700  |
| H | 5.50159000  | -3.02628900 | 1.09099500  |
| C | 5.27871300  | -0.06128000 | -2.51113000 |
| H | 5.53103300  | -1.00518800 | -2.98105900 |
| C | 5.31079300  | -0.60492100 | 3.46212700  |
| H | 5.61692400  | -0.40516400 | 4.48202500  |
| C | 5.68332400  | 1.14102600  | -3.08589700 |
| H | 6.25573300  | 1.13163200  | -4.00566300 |
| C | 5.35642600  | 2.34831600  | -2.48674500 |
| H | 5.67432100  | 3.27962500  | -2.93998300 |
| C | 0.16238100  | -1.61103900 | -0.78911200 |
| C | -0.18676100 | -0.31481200 | -0.13446000 |
| C | -1.46905900 | 0.09399500  | 0.08547300  |
| H | -1.57863600 | 1.06034000  | 0.56879700  |
| C | -2.68611000 | -0.60682300 | -0.20337400 |
| H | -2.58203800 | -1.61706600 | -0.56951100 |
| C | -3.92553100 | -0.08954700 | -0.02024600 |
| C | -5.12153900 | -0.94296200 | -0.20420400 |
| C | -5.08327900 | -2.31200900 | 0.08034300  |
| C | -6.31717600 | -0.39910900 | -0.68353400 |
| C | -6.19722600 | -3.10997300 | -0.12108900 |
| H | -4.17772300 | -2.74918100 | 0.48134400  |
| C | -7.42874000 | -1.20009800 | -0.89228700 |

|   |             |             |             |
|---|-------------|-------------|-------------|
| H | -6.36967900 | 0.65860700  | -0.90833300 |
| C | -7.37355400 | -2.55819800 | -0.61154300 |
| H | -6.14869400 | -4.16669300 | 0.11260700  |
| H | -8.34167500 | -0.76121800 | -1.27662800 |
| H | -8.24436700 | -3.18322300 | -0.76860900 |
| C | -4.15450800 | 1.33246400  | 0.34542000  |
| C | -4.91519200 | 1.65511700  | 1.47174200  |
| C | -3.63278800 | 2.36916900  | -0.42892800 |
| C | -5.12405300 | 2.97748700  | 1.82785100  |
| H | -5.33624600 | 0.85969900  | 2.07496600  |
| C | -3.85483600 | 3.69438600  | -0.07987800 |
| H | -3.06494700 | 2.13160900  | -1.32036100 |
| C | -4.59563800 | 4.00175300  | 1.05167200  |
| H | -5.70468100 | 3.21064800  | 2.71231800  |
| H | -3.44992600 | 4.48719000  | -0.69735500 |
| H | -4.76702100 | 5.03571000  | 1.32593200  |
| O | -0.67864900 | -2.40183200 | -1.20513700 |

---

**Table S5** Cartesian coordinates (in Angstroms) for the optimized structure of **Trip\_chrom (TT)**

| Atom type | X          | Y           | Z           |
|-----------|------------|-------------|-------------|
| C         | 0.68227000 | 0.18990700  | 0.03881300  |
| H         | 0.23546300 | 1.11120700  | 0.39288800  |
| C         | 1.91287300 | -2.22306800 | -0.86064300 |
| H         | 2.36591600 | -3.14503200 | -1.20483200 |
| C         | 3.93447400 | 1.30240800  | -0.78776100 |
| C         | 2.01599500 | 0.06189700  | 0.01260500  |
| C         | 3.90241300 | 0.42458200  | 1.48886600  |
| C         | 4.49699800 | -0.75845700 | 1.04248700  |
| C         | 4.10844800 | 0.86317700  | 2.78354300  |
| H         | 3.64465300 | 1.77945000  | 3.13121900  |
| C         | 3.04643600 | 1.09961500  | 0.42923400  |
| H         | 2.58815500 | 2.02361000  | 0.77901200  |
| C         | 4.16766900 | 2.49438700  | -1.44779600 |
| H         | 3.70460300 | 3.41153400  | -1.10134500 |
| C         | 4.15642600 | -1.09450800 | -0.40085600 |
| H         | 4.63014700 | -2.01130800 | -0.74750100 |
| C         | 5.50819000 | -1.05706400 | 3.19280400  |
| H         | 6.13694100 | -1.63197700 | 3.86200200  |

|   |             |             |             |
|---|-------------|-------------|-------------|
| C | 4.52842200  | 0.12006500  | -1.23688000 |
| C | 2.63889000  | -1.17249800 | -0.45122300 |
| C | 5.29546800  | -1.50269500 | 1.89069200  |
| H | 5.75310700  | -2.42282200 | 1.54519100  |
| C | 5.35325000  | 0.12990700  | -2.34613400 |
| H | 5.81022000  | -0.78853900 | -2.69694000 |
| C | 4.91873400  | 0.11753900  | 3.63608000  |
| H | 5.08835300  | 0.45736900  | 4.65072800  |
| C | 5.59309300  | 1.33201400  | -3.00701800 |
| H | 6.24239200  | 1.34870300  | -3.87408700 |
| C | 5.00450500  | 2.50595100  | -2.56087400 |
| H | 5.19553400  | 3.43717800  | -3.08059200 |
| C | 0.45077500  | -2.17133900 | -0.86290600 |
| C | -0.17653600 | -0.89471200 | -0.39281400 |
| C | -1.53377200 | -0.84397600 | -0.40206900 |
| H | -2.02722700 | -1.74991500 | -0.73616000 |
| C | -2.35383300 | 0.28009400  | -0.05107400 |
| H | -1.85552900 | 1.22192300  | 0.14494600  |
| C | -3.70574200 | 0.27270800  | 0.01922900  |
| C | -4.44055400 | 1.53959600  | 0.24928700  |
| C | -4.00250600 | 2.74114900  | -0.31481000 |
| C | -5.58611300 | 1.56087200  | 1.04989000  |
| C | -4.67742100 | 3.92712300  | -0.07231200 |
| H | -3.14137200 | 2.73943500  | -0.97166000 |
| C | -6.25492400 | 2.74859700  | 1.29943900  |
| H | -5.94552500 | 0.63904800  | 1.48978700  |
| C | -5.80343800 | 3.93616800  | 0.73957900  |
| H | -4.32862800 | 4.84613700  | -0.52791400 |
| H | -7.13358700 | 2.74648400  | 1.93322300  |
| H | -6.33160200 | 4.86298700  | 0.92827600  |
| C | -4.51129000 | -0.96705000 | -0.10961300 |
| C | -5.58312200 | -1.01520100 | -1.00472900 |
| C | -4.23171600 | -2.09643700 | 0.66060300  |
| C | -6.33414400 | -2.17021000 | -1.14542800 |
| H | -5.81814900 | -0.14199900 | -1.60134900 |
| C | -4.99347000 | -3.24886000 | 0.52892400  |
| H | -3.42146400 | -2.06455600 | 1.37844000  |
| C | -6.04209400 | -3.29082000 | -0.37760700 |
| H | -7.15172300 | -2.19653100 | -1.85575600 |
| H | -4.76457100 | -4.11528200 | 1.13738400  |

|   |             |             |             |
|---|-------------|-------------|-------------|
| H | -6.63362300 | -4.19209300 | -0.48409600 |
| O | -0.21880000 | -3.12627200 | -1.23350300 |

**Table S6** Cartesian coordinates (in Angstroms) for the optimized structure of **7-8Nap**

| Atom type | X           | Y           | Z           |
|-----------|-------------|-------------|-------------|
| O         | 0.07252200  | -0.67222000 | -0.01552200 |
| C         | 2.42263500  | -0.54637000 | -0.28584900 |
| C         | 1.28109500  | -0.40472300 | 0.54489700  |
| C         | -1.22385300 | 1.35169300  | -0.04256700 |
| C         | 1.39536100  | -0.09046000 | 1.87971000  |
| C         | -3.57790800 | -0.42623100 | 0.14845300  |
| H         | -3.74247000 | 0.61375300  | 0.40414100  |
| C         | -1.01407400 | -0.05828000 | 2.06245300  |
| H         | -1.94262000 | -0.05572600 | 2.61863100  |
| C         | 0.17043100  | -0.05524900 | 2.66562900  |
| H         | 0.24593600  | -0.04797200 | 3.74738400  |
| C         | -2.28302800 | -0.93824600 | 0.12646300  |
| C         | -2.09044400 | -2.27127100 | -0.21774700 |
| H         | -1.08796500 | -2.67541900 | -0.23300300 |
| C         | -3.17453000 | -3.07566600 | -0.54400300 |
| H         | -3.00843800 | -4.11110500 | -0.81706000 |
| C         | -1.23450900 | 1.48653000  | -1.43100700 |
| H         | -1.16893300 | 0.60063200  | -2.05097700 |
| C         | -4.46222300 | -2.56142600 | -0.51893800 |
| H         | -5.30693400 | -3.19066100 | -0.77257400 |
| C         | -1.10806700 | -0.05692300 | 0.55167900  |
| C         | -1.40887100 | 3.74948700  | 0.15495700  |
| H         | -1.47405200 | 4.63085900  | 0.78184700  |
| C         | -4.66055300 | -1.23281600 | -0.16845900 |
| H         | -5.66167800 | -0.81883300 | -0.14886100 |
| C         | -1.32678700 | 2.73611900  | -2.01779400 |
| H         | -1.33004200 | 2.82557700  | -3.09762700 |
| C         | -1.30713300 | 2.49244300  | 0.74307700  |
| H         | -1.28548600 | 2.40682100  | 1.82178700  |
| C         | -1.41778200 | 3.87468800  | -1.22380400 |
| H         | -1.49267800 | 4.85344400  | -1.68242900 |
| C         | 3.70232100  | -0.33756600 | 0.29071400  |
| C         | 4.72143600  | -0.81059700 | -1.85407900 |
| H         | 5.60534600  | -0.91521500 | -2.47190300 |

|   |            |             |             |
|---|------------|-------------|-------------|
| C | 3.44592800 | -1.01678700 | -2.42107900 |
| H | 3.36159900 | -1.27631500 | -3.46948800 |
| C | 2.68237400 | 0.11550400  | 2.43113600  |
| H | 2.76071100 | 0.36186700  | 3.48420200  |
| C | 3.80325400 | 0.00199600  | 1.66474000  |
| H | 4.78484500 | 0.16163100  | 2.09483600  |
| C | 2.32095700 | -0.88621800 | -1.65581800 |
| C | 4.84416800 | -0.47803900 | -0.53389900 |
| H | 1.33827000 | -1.03761600 | -2.08129600 |
| H | 5.82321600 | -0.31750800 | -0.09662000 |

**Table S7** Cartesian coordinates (in Angstroms) for the optimized structure of **7-8\_TC**

| Atom type | X           | Y           | Z           |
|-----------|-------------|-------------|-------------|
| C         | 3.92412800  | -0.50775000 | 0.08230100  |
| C         | 1.69465300  | 0.66357400  | -0.16875900 |
| C         | -0.62289200 | -0.32233700 | -0.05787900 |
| H         | -0.22799200 | -1.32405300 | 0.01520900  |
| C         | 0.33401100  | 0.73561000  | -0.20756200 |
| H         | -0.07602400 | 1.72109100  | -0.40715800 |
| C         | 4.57714900  | 0.71199200  | -0.15687700 |
| C         | 6.70247200  | -0.41294400 | 0.07707500  |
| H         | 7.78544800  | -0.37512900 | 0.07493900  |
| C         | 6.04955000  | -1.62139100 | 0.31362100  |
| H         | 6.62221600  | -2.52255000 | 0.49504200  |
| C         | 2.45720700  | 1.87795500  | -0.40313700 |
| H         | 1.89265100  | 2.78538500  | -0.58841900 |
| C         | 3.79610300  | 1.91085000  | -0.39909900 |
| H         | 4.32610500  | 2.83876300  | -0.57902800 |
| C         | 4.66850100  | -1.66314900 | 0.31591500  |
| C         | 5.97513400  | 0.73936500  | -0.15494500 |
| H         | 4.13242600  | -2.58559500 | 0.49798800  |
| H         | 6.48564700  | 1.67801600  | -0.33820500 |
| C         | 2.44105000  | -0.59474900 | 0.09650900  |
| O         | 1.88913200  | -1.66333300 | 0.31781600  |
| C         | -1.96538600 | -0.13705200 | -0.03097300 |
| C         | -2.87611900 | -1.30486300 | -0.02533800 |
| C         | -2.58791400 | 1.21132800  | 0.01567200  |
| C         | -2.53073700 | -2.49414900 | -0.67573100 |
| C         | -4.10149000 | -1.24862100 | 0.64573500  |



|   |             |             |             |
|---|-------------|-------------|-------------|
| C | -2.24599400 | 2.12866700  | 1.00995100  |
| C | -3.54396400 | 1.57855400  | -0.93433200 |
| C | -3.37488400 | -3.59169700 | -0.64344700 |
| H | -1.60156400 | -2.55058300 | -1.22843600 |
| C | -4.94172000 | -2.35007000 | 0.68407700  |
| H | -4.39014900 | -0.33720100 | 1.15369200  |
| C | -2.83427100 | 3.38550900  | 1.04630700  |
| H | -1.52719800 | 1.84496200  | 1.76906900  |
| C | -4.12007000 | 2.83810400  | -0.90610000 |
| H | -3.82747600 | 0.87138400  | -1.70462100 |
| C | -4.58229800 | -3.52552700 | 0.03953300  |
| H | -3.09193100 | -4.50080400 | -1.16025800 |
| H | -5.88112200 | -2.28973300 | 1.22040300  |
| C | -3.76779900 | 3.74530000  | 0.08574500  |
| H | -2.56372700 | 4.08255800  | 1.83030500  |
| H | -4.84947000 | 3.11254300  | -1.65867100 |
| H | -5.24215100 | -4.38439200 | 0.06405200  |
| H | -4.22525400 | 4.72696100  | 0.11200900  |

**Table S8** Cartesian coordinates (in Angstroms) for the optimized structure of **7-8\_TT**

| Atom type | X           | Y           | Z           |
|-----------|-------------|-------------|-------------|
| C         | 4.13150200  | 0.19357100  | -0.11276300 |
| C         | 1.65282800  | -0.33153900 | -0.00023700 |
| C         | -0.81906300 | -0.67952700 | 0.01298400  |
| H         | -0.70227300 | -1.75411600 | 0.08379900  |
| C         | 0.37314800  | 0.11143500  | -0.10230500 |
| H         | 0.26213800  | 1.16827700  | -0.31682000 |
| C         | 4.40460200  | -1.15128200 | 0.18298900  |
| C         | 6.76775800  | -0.66374700 | 0.07020100  |
| H         | 7.79574400  | -0.99897100 | 0.14139900  |
| C         | 6.49060700  | 0.66974600  | -0.22286300 |
| H         | 7.30044900  | 1.37154500  | -0.37964500 |
| C         | 2.02877100  | -1.69828400 | 0.30635500  |
| H         | 1.24497600  | -2.42491400 | 0.47814000  |
| C         | 3.30938300  | -2.08327000 | 0.39219100  |
| H         | 3.55847900  | -3.11205400 | 0.62534000  |
| C         | 5.17722500  | 1.09183400  | -0.31267600 |
| C         | 5.73693400  | -1.56368500 | 0.27100500  |
| H         | 4.92899300  | 2.12085800  | -0.53891500 |

|   |             |             |             |
|---|-------------|-------------|-------------|
| H | 5.95614700  | -2.60062600 | 0.49904500  |
| C | 2.73173000  | 0.67541200  | -0.21751900 |
| O | 2.48547400  | 1.84335300  | -0.47175100 |
| C | -2.08371600 | -0.19683900 | 0.00342000  |
| C | -3.23255200 | -1.13357100 | -0.01514200 |
| C | -2.38947200 | 1.25532900  | 0.02905400  |
| C | -3.17445700 | -2.33449200 | -0.72826200 |
| C | -4.39887600 | -0.84042900 | 0.69727800  |
| C | -1.82911000 | 2.09657200  | 0.99085200  |
| C | -3.26485600 | 1.80331900  | -0.91207100 |
| C | -4.23968700 | -3.22086100 | -0.71408800 |
| H | -2.29646700 | -2.56203600 | -1.32014100 |
| C | -5.46002600 | -1.73141100 | 0.71826900  |
| H | -4.46629000 | 0.08834600  | 1.24975300  |
| C | -2.12370900 | 3.45263300  | 1.00283400  |
| H | -1.17063200 | 1.68074800  | 1.74342800  |
| C | -3.54747800 | 3.15911700  | -0.90788800 |
| H | -3.71599900 | 1.15993000  | -1.65787600 |
| C | -5.38461000 | -2.92500200 | 0.01320800  |
| H | -4.17922300 | -4.14175800 | -1.28160200 |
| H | -6.35029800 | -1.49209500 | 1.28734800  |
| C | -2.97836200 | 3.98809500  | 0.05098900  |
| H | -1.68279500 | 4.09043100  | 1.75922700  |
| H | -4.21576200 | 3.57115700  | -1.65442000 |
| H | -6.21739300 | -3.61776700 | 0.02365900  |
| H | -3.20466400 | 5.04747400  | 0.05740200  |

**Table S9** Cartesian coordinates (in Angstroms) for the optimized structure of **5-6Nap**

| Atom type | X           | Y           | Z           |
|-----------|-------------|-------------|-------------|
| O         | 0.42199000  | -0.70259500 | 0.87676800  |
| C         | -1.61130600 | -0.52594500 | 2.04592200  |
| H         | -1.02895300 | -0.54617100 | 2.95806900  |
| C         | -0.93080000 | -0.57826200 | 0.81399100  |
| C         | 1.35536100  | 1.29674500  | -0.08054400 |
| C         | -1.60251200 | -0.58044600 | -0.38878900 |
| C         | 3.66019400  | -0.40628500 | -0.81253300 |
| H         | 3.57005300  | 0.52581800  | -1.35764000 |
| C         | 0.52976600  | -0.62264300 | -1.53126700 |
| H         | 1.15922800  | -0.79245000 | -2.39525100 |

|   |             |             |             |
|---|-------------|-------------|-------------|
| C | -0.79148500 | -0.76507200 | -1.58564000 |
| H | -1.26551300 | -1.06273700 | -2.51207700 |
| C | 2.55777200  | -0.92392400 | -0.13711300 |
| C | 2.69641900  | -2.11341100 | 0.56853800  |
| H | 1.84311000  | -2.52066800 | 1.09221200  |
| C | 3.92029300  | -2.76878900 | 0.60620700  |
| H | 4.01526500  | -3.69154300 | 1.16638300  |
| C | 1.82218000  | 1.79249200  | 1.13671100  |
| H | 2.06092600  | 1.09956800  | 1.93435500  |
| C | 5.01475300  | -2.24996400 | -0.06912200 |
| H | 5.96865200  | -2.76279300 | -0.03945500 |
| C | 1.20406000  | -0.22098600 | -0.23847400 |
| C | 1.21110700  | 3.55923300  | -0.90633500 |
| H | 0.96703600  | 4.24488600  | -1.70906300 |
| C | 4.87945400  | -1.06624400 | -0.78184400 |
| H | 5.72842100  | -0.64932700 | -1.31050800 |
| C | 1.97642700  | 3.15388100  | 1.33077500  |
| H | 2.33624100  | 3.52511300  | 2.28308000  |
| C | 1.04817700  | 2.19052800  | -1.09659000 |
| H | 0.67020700  | 1.82323400  | -2.04204800 |
| C | 1.67332300  | 4.04376100  | 0.30557300  |
| H | 1.79581400  | 5.10973000  | 0.45602400  |
| C | -3.02760500 | -0.47924300 | -0.38741700 |
| C | -3.79515700 | -0.43876200 | -1.57764500 |
| H | -3.29709800 | -0.47071800 | -2.53768600 |
| C | -5.15928200 | -0.34511000 | -1.53588900 |
| H | -5.72428600 | -0.31393900 | -2.45995400 |
| C | -3.71514200 | -0.41200200 | 0.85376700  |
| C | -5.12655700 | -0.31433700 | 0.86335700  |
| H | -5.63532800 | -0.26331900 | 1.81964600  |
| C | -5.83803200 | -0.28304400 | -0.30252100 |
| H | -6.91839300 | -0.20793800 | -0.28397700 |
| C | -2.97105100 | -0.44664500 | 2.06029100  |
| H | -3.50344200 | -0.39914300 | 3.00330000  |

---

**Table S10** Cartesian coordinates (in Angstroms) for the optimized structure of **5-6\_TC**

| Atom type | X           | Y           | Z           |
|-----------|-------------|-------------|-------------|
| O         | -1.08372500 | -3.07946600 | 0.20790200  |
| C         | -3.35920400 | -2.79131000 | 0.60437600  |
| H         | -3.41042600 | -3.83269800 | 0.89636300  |
| C         | -2.02883300 | -2.30177100 | 0.23437000  |
| C         | -1.90329900 | -0.84557000 | -0.06271400 |
| C         | -0.68792100 | -0.23727200 | -0.12420600 |
| H         | -0.69019500 | 0.83784500  | -0.24926300 |
| C         | -3.14173800 | -0.04942600 | -0.21043400 |
| C         | -3.14682000 | 1.26559900  | -0.69023200 |
| H         | -2.22629700 | 1.73327800  | -1.01192800 |
| C         | -4.31872500 | 1.99297800  | -0.79201900 |
| H         | -4.28388000 | 3.00799700  | -1.16918400 |
| C         | -4.38238300 | -0.62295200 | 0.12990300  |
| C         | -5.55886700 | 0.12319700  | 0.02644300  |
| H         | -6.49861100 | -0.34255100 | 0.30136400  |
| C         | -5.53532100 | 1.42726400  | -0.42534100 |
| H         | -6.45262200 | 1.99713900  | -0.50540000 |
| C         | -4.44024500 | -2.00598300 | 0.56316100  |
| H         | -5.41299200 | -2.40323300 | 0.83493400  |
| C         | 0.62129000  | -0.82522800 | -0.04484900 |
| H         | 0.67445100  | -1.90212300 | -0.04242900 |
| C         | 1.76885600  | -0.10540500 | -0.01069700 |
| C         | 3.07896200  | -0.79391300 | -0.07503900 |
| C         | 3.23547600  | -1.98454100 | -0.79212500 |
| C         | 4.19001000  | -0.27334800 | 0.59522900  |
| C         | 4.45637700  | -2.63776900 | -0.82523200 |
| H         | 2.39726900  | -2.38948800 | -1.34478200 |
| C         | 5.40911800  | -0.93210700 | 0.56801500  |
| H         | 4.09201100  | 0.64878900  | 1.15399000  |
| C         | 5.54746700  | -2.11631900 | -0.14241500 |
| H         | 4.55817600  | -3.55479600 | -1.39299200 |
| H         | 6.25446300  | -0.51843000 | 1.10472600  |
| H         | 6.50210200  | -2.62778700 | -0.16911200 |
| C         | 1.78643600  | 1.37620600  | 0.10624700  |
| C         | 1.13661400  | 2.02426900  | 1.15730100  |
| C         | 2.47251300  | 2.14819500  | -0.83436600 |
| C         | 1.16039200  | 3.40875400  | 1.25869900  |
| H         | 0.62469000  | 1.43537000  | 1.90871800  |

|   |            |            |             |
|---|------------|------------|-------------|
| C | 2.48402000 | 3.53031000 | -0.74067300 |
| H | 2.99158100 | 1.65711800 | -1.64883200 |
| C | 1.82885800 | 4.16507200 | 0.30766000  |
| H | 0.65709500 | 3.89496200 | 2.08573300  |
| H | 3.00917600 | 4.11521800 | -1.48623800 |
| H | 1.84562300 | 5.24554300 | 0.38474000  |

---

**Table S11** Cartesian coordinates (in Angstroms) for the optimized structure of **5-6\_TT**

| Atom type | X           | Y           | Z           |
|-----------|-------------|-------------|-------------|
| O         | -2.15663000 | 3.11475400  | -0.65295400 |
| C         | -4.14965800 | 1.92545100  | -0.96033400 |
| H         | -4.60573600 | 2.81122700  | -1.38417200 |
| C         | -2.74158700 | 2.04692900  | -0.56940300 |
| C         | -2.05695400 | 0.78473500  | -0.14352700 |
| C         | -0.70520700 | 0.81742100  | -0.24292500 |
| H         | -0.30035300 | 1.79553500  | -0.48248800 |
| C         | -2.88561200 | -0.37011200 | 0.23059100  |
| C         | -2.40809600 | -1.44201100 | 0.99100500  |
| H         | -1.40147100 | -1.41741600 | 1.38239200  |
| C         | -3.21868800 | -2.52339600 | 1.29747800  |
| H         | -2.81931700 | -3.33806400 | 1.88941900  |
| C         | -4.24536200 | -0.38201500 | -0.14384500 |
| C         | -5.04647800 | -1.48221000 | 0.16008500  |
| H         | -6.08556000 | -1.47592400 | -0.14960900 |
| C         | -4.53788900 | -2.55852900 | 0.86440000  |
| H         | -5.16974300 | -3.40634100 | 1.09825600  |
| C         | -4.82714600 | 0.78585300  | -0.78509800 |
| H         | -5.86965700 | 0.72181300  | -1.08006100 |
| C         | 0.23483100  | -0.27156300 | -0.18261100 |
| H         | -0.16095000 | -1.27481800 | -0.27600600 |
| C         | 1.57797100  | -0.13720300 | -0.09698800 |
| C         | 2.44916800  | -1.33131500 | -0.22236700 |
| C         | 2.14064700  | -2.35937300 | -1.11729100 |
| C         | 3.59327700  | -1.46156500 | 0.56953900  |
| C         | 2.94117400  | -3.48750100 | -1.20591300 |
| H         | 1.27904700  | -2.26077500 | -1.76612500 |
| C         | 4.38863600  | -2.59342100 | 0.48638000  |
| H         | 3.85252800  | -0.67275800 | 1.26465400  |
| C         | 4.06573800  | -3.61080500 | -0.40138900 |

|   |            |             |             |
|---|------------|-------------|-------------|
| H | 2.69047600 | -4.26911500 | -1.91303600 |
| H | 5.26485000 | -2.68109000 | 1.11753000  |
| H | 4.69169300 | -4.49220600 | -0.47146100 |
| C | 2.23573900 | 1.16982000  | 0.14408400  |
| C | 1.79724800 | 2.02947600  | 1.15216300  |
| C | 3.32045400 | 1.56387100  | -0.64512800 |
| C | 2.41476900 | 3.25527600  | 1.35682300  |
| H | 0.97655700 | 1.72723000  | 1.79075200  |
| C | 3.92805400 | 2.79237900  | -0.44850300 |
| H | 3.67839800 | 0.90384000  | -1.42596200 |
| C | 3.47755500 | 3.64201800  | 0.55469100  |
| H | 2.06243800 | 3.90793800  | 2.14623000  |
| H | 4.75711700 | 3.08902400  | -1.07967000 |
| H | 3.95721500 | 4.60061700  | 0.71149300  |

**Table S12** Cartesian coordinates (in Angstroms) for the optimized structure of **BP**

| Atom type | X           | Y           | Z           |
|-----------|-------------|-------------|-------------|
| C         | 4.04099100  | -0.94048600 | -1.35940800 |
| C         | 2.67139600  | -0.85004700 | -1.56034800 |
| C         | 1.82306600  | -0.81930700 | -0.46475300 |
| C         | 2.32755500  | -0.89308700 | 0.83594600  |
| C         | 3.70530000  | -0.98565000 | 1.01557000  |
| C         | 4.56320000  | -1.00377400 | -0.07263300 |
| H         | 4.70481400  | -0.95740100 | -2.21541500 |
| H         | 2.24589900  | -0.80130900 | -2.55454300 |
| H         | 4.09985100  | -1.04772200 | 2.02385000  |
| H         | 5.63309300  | -1.07203700 | 0.07900600  |
| C         | 1.36072400  | -0.91064200 | 1.92552600  |
| H         | 1.69870400  | -1.18759300 | 2.91792500  |
| C         | 0.08857900  | -0.60402400 | 1.69551800  |
| H         | -0.65432200 | -0.61774100 | 2.48286400  |
| C         | -0.37935700 | -0.20869100 | 0.31052000  |
| C         | -0.38079100 | 1.30862500  | 0.08983600  |
| C         | -0.07193100 | 2.21499400  | 1.09426100  |
| C         | -0.69671900 | 1.79082000  | -1.18053400 |
| C         | -0.08670200 | 3.58313200  | 0.84025900  |
| H         | 0.19117900  | 1.85797400  | 2.08162400  |
| C         | -0.70413300 | 3.15037100  | -1.43700100 |
| H         | -0.93360400 | 1.08787400  | -1.96987700 |

|   |             |             |             |
|---|-------------|-------------|-------------|
| C | -0.40142500 | 4.05361100  | -0.42321900 |
| H | 0.15595900  | 4.27849800  | 1.63502800  |
| H | -0.94829200 | 3.51016900  | -2.42951300 |
| H | -0.40948200 | 5.11854900  | -0.62265100 |
| C | -1.76778800 | -0.80401900 | 0.07128700  |
| C | -1.92350700 | -2.00631500 | -0.60845400 |
| C | -2.89309300 | -0.17320600 | 0.59592300  |
| C | -3.18536600 | -2.56421700 | -0.76768900 |
| H | -1.05274300 | -2.49985800 | -1.01641500 |
| C | -4.15154700 | -0.73550700 | 0.44401700  |
| H | -2.78834100 | 0.77073600  | 1.11770200  |
| C | -4.30259700 | -1.93345900 | -0.24135500 |
| H | -3.29238200 | -3.49876000 | -1.30572900 |
| H | -5.01767300 | -0.23139000 | 0.85602000  |
| H | -5.28617500 | -2.37046100 | -0.36558500 |
| O | 0.47979900  | -0.79428400 | -0.69173800 |

**Table S13** Cartesian coordinates (in Angstroms) for the optimized structure of **BP\_TC**

| Atom type | X           | Y           | Z           |
|-----------|-------------|-------------|-------------|
| C         | 5.57447200  | -0.42921500 | -0.03101600 |
| C         | 4.74873200  | -1.46382700 | 0.21153500  |
| C         | 3.29483500  | -1.31217800 | 0.21019400  |
| C         | 2.78285100  | 0.05322600  | -0.09464600 |
| C         | 3.74353800  | 1.10814500  | -0.34228200 |
| C         | 5.07093900  | 0.89158600  | -0.31420100 |
| H         | 6.64812000  | -0.58258700 | -0.01512000 |
| H         | 5.11875700  | -2.45845300 | 0.42678500  |
| H         | 3.35343400  | 2.09734600  | -0.55690300 |
| H         | 5.76927100  | 1.69668700  | -0.50322700 |
| C         | 1.45386200  | 0.36371300  | -0.16087200 |
| H         | 1.22297000  | 1.40009900  | -0.38898100 |
| C         | 0.33434500  | -0.51447300 | -0.00719400 |
| H         | 0.56054100  | -1.56479500 | 0.09848000  |
| C         | -0.96006700 | -0.10708100 | -0.01480300 |
| C         | -2.05185900 | -1.10594700 | -0.00740000 |
| C         | -1.89278900 | -2.35414800 | -0.61880200 |
| C         | -3.26624200 | -0.82803900 | 0.62781100  |
| C         | -2.90852100 | -3.29474700 | -0.58459600 |
| H         | -0.97231600 | -2.57964500 | -1.14198800 |

|   |             |             |             |
|---|-------------|-------------|-------------|
| C | -4.27835800 | -1.77368900 | 0.66908400  |
| H | -3.41080000 | 0.13224500  | 1.10623400  |
| C | -4.10391100 | -3.00981900 | 0.06254300  |
| H | -2.76861100 | -4.25258600 | -1.07086500 |
| H | -5.20689400 | -1.54400300 | 1.17771600  |
| H | -4.89761500 | -3.74665400 | 0.08906900  |
| C | -1.34769900 | 1.32651000  | -0.00868100 |
| C | -0.87198200 | 2.19701900  | 0.97258400  |
| C | -2.21185700 | 1.82593400  | -0.98620800 |
| C | -1.23948900 | 3.53562800  | 0.96946300  |
| H | -0.22549900 | 1.81487800  | 1.75324400  |
| C | -2.56553500 | 3.16517000  | -0.99765500 |
| H | -2.59813500 | 1.15826100  | -1.74696200 |
| C | -2.08154900 | 4.02407800  | -0.01834700 |
| H | -0.86843300 | 4.19590600  | 1.74404100  |
| H | -3.22447900 | 3.54026300  | -1.77144400 |
| H | -2.36620500 | 5.06930800  | -0.02310700 |
| O | 2.56545100  | -2.27041800 | 0.45049700  |

**Table S14** Cartesian coordinates (in Angstroms) for the optimized structure of **BP\_TT**

| Atom type | X           | Y           | Z           |
|-----------|-------------|-------------|-------------|
| C         | 5.40850100  | -1.28564100 | 0.14765700  |
| C         | 5.18011100  | 0.00481800  | -0.15303300 |
| C         | 3.82034900  | 0.53392800  | -0.26097100 |
| C         | 2.71356300  | -0.44085600 | -0.02056700 |
| C         | 3.04952400  | -1.80992700 | 0.30179600  |
| C         | 4.32901200  | -2.21703000 | 0.38277200  |
| H         | 6.42763200  | -1.64979700 | 0.22000400  |
| H         | 5.98444600  | 0.70813300  | -0.32903700 |
| H         | 2.24999000  | -2.51584600 | 0.48824900  |
| H         | 4.56677600  | -3.24458800 | 0.62713700  |
| C         | 1.44300100  | 0.03673100  | -0.11793400 |
| H         | 1.36465200  | 1.09405200  | -0.34687100 |
| C         | 0.22964100  | -0.71289200 | 0.01803700  |
| H         | 0.31123300  | -1.78929100 | 0.10766700  |
| C         | -1.01881800 | -0.18632500 | 0.00634000  |
| C         | -2.19863100 | -1.08269500 | 0.00574100  |
| C         | -2.18371900 | -2.29579000 | -0.68899200 |
| C         | -3.35168400 | -0.73805700 | 0.71683900  |



|   |             |             |             |
|---|-------------|-------------|-------------|
| C | -3.27934700 | -3.14366400 | -0.65930700 |
| H | -1.31605800 | -2.56299400 | -1.27949900 |
| C | -4.44286200 | -1.59137100 | 0.75424000  |
| H | -3.38474700 | 0.20060000  | 1.25548300  |
| C | -4.41095000 | -2.79697900 | 0.06655100  |
| H | -3.25309700 | -4.07437000 | -1.21318400 |
| H | -5.32242800 | -1.31298200 | 1.32211000  |
| H | -5.26731300 | -3.46005700 | 0.08948300  |
| C | -1.27366300 | 1.27508000  | 0.01334000  |
| C | -0.67490000 | 2.11016800  | 0.95744800  |
| C | -2.13829400 | 1.83890500  | -0.92859300 |
| C | -0.92193600 | 3.47564200  | 0.95125600  |
| H | -0.02515100 | 1.68282300  | 1.71110300  |
| C | -2.37242800 | 3.20371800  | -0.94298900 |
| H | -2.61812200 | 1.20074500  | -1.66079800 |
| C | -1.76572600 | 4.02622900  | -0.00164600 |
| H | -0.45212100 | 4.10887900  | 1.69387100  |
| H | -3.03209100 | 3.62803500  | -1.69024700 |
| H | -1.95436900 | 5.09292400  | -0.00975500 |
| O | 3.60953900  | 1.70872400  | -0.53420400 |

---

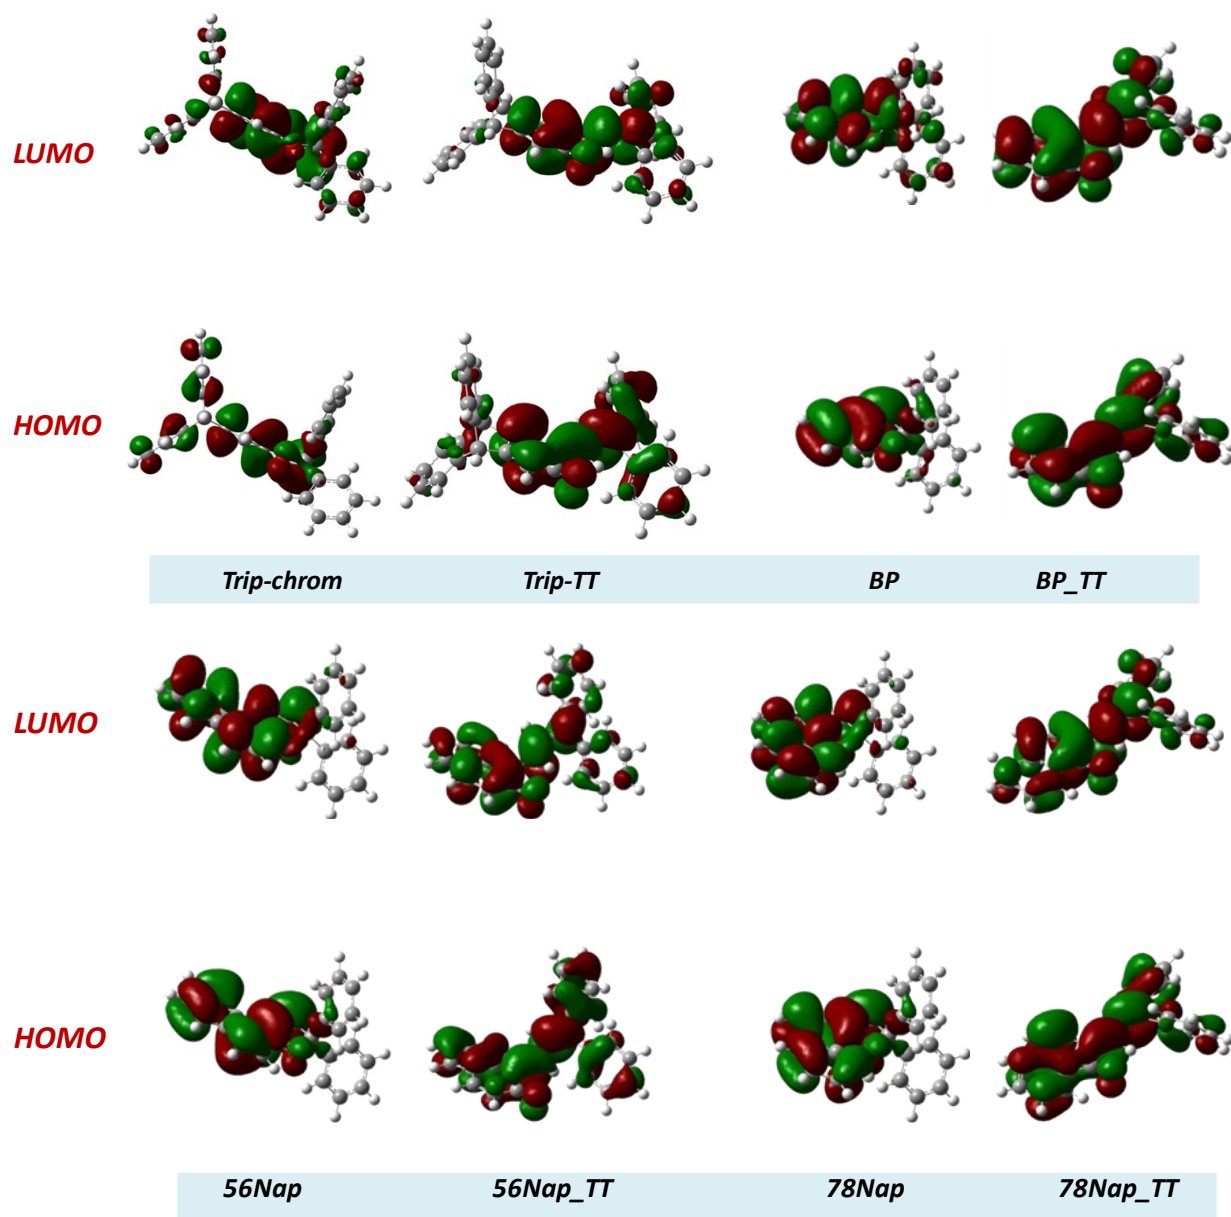

**Fig. S8** Frontier orbital plots for **Trip-chrom** (top left), **BP** (top right), **56Nap** (down left) and **78Nap** (down right).

### Reference

1. M. J Frisch, et. al. *Gaussian 09*, Revision E.01, Gaussian, Inc., Wallingford CT, 2009.
